# Supplementary material for: Efficacy and safety of immunosuppressive medications for steroid-resistant nephrotic syndrome in children: a systematic review and network meta-analysis
Source: PubMed Central journal article supplement (PMC5641191; doi:10.18632/oncotarget.20377), 2017-08-21
Supplement: oncotarget-08-73050-s001.pdf [file oncotarget-08-73050-s001.pdf]

# Efficacy and safety of immunosuppressive medications for steroid-resistant nephrotic syndrome in children: a systematic review and network meta-analysis

## SUPPLEMENTARY MATERIALS

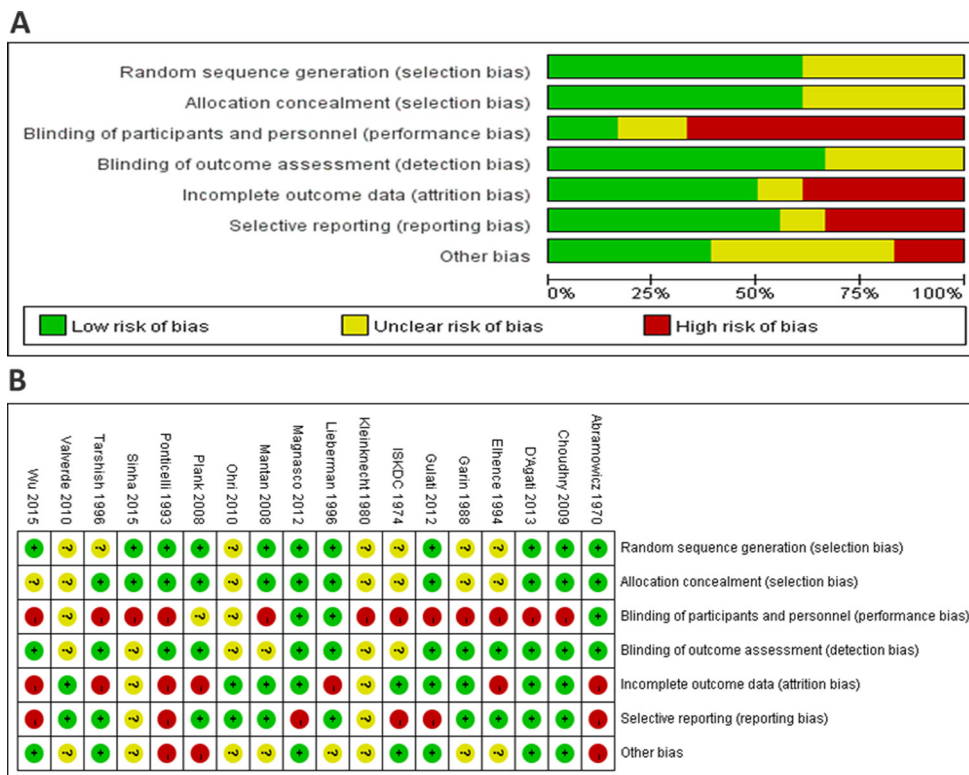

**Supplementary Figure 1: Risk of bias.** (A) Summary of bias across all included studies. (B) Characteristics of bias risk for each of the individual included studies.
